# Supplementary material for: Herbivores at the highest risk of extinction among mammals, birds, and reptiles
Source: PubMed Central journal article supplement — Sci Adv. 2020 Aug 5;6(32):eabb8458. doi: 10.1126/sciadv.abb8458 (PMC7457337; doi:10.1126/sciadv.abb8458), 2020-08-05
Supplement: abb8458_SM.pdf [file abb8458_SM.pdf]

## Supplementary Materials for

### **Herbivores at the highest risk of extinction among mammals, birds, and reptiles**

Trisha B. Atwood\*, Shaley A. Valentine, Edd Hammill, Douglas J. McCauley, Elizabeth M. P. Madin,  
Karen H. Beard, William D. Pearse

\*Corresponding author. Email: [trisha.atwood@usu.edu](mailto:trisha.atwood@usu.edu)

Published 5 August 2020, *Sci. Adv.* **6**, eabb8458 (2020)  
DOI: 10.1126/sciadv.abb8458

#### **The PDF file includes:**

Fig. S1  
Tables S1 to S9

#### **Other Supplementary Material for this manuscript includes the following:**

(available at [advances.sciencemag.org/cgi/content/full/6/32/eabb8458/DC1](https://advances.sciencemag.org/cgi/content/full/6/32/eabb8458/DC1))

Diet data sets  
Phylogenetic GLM R code

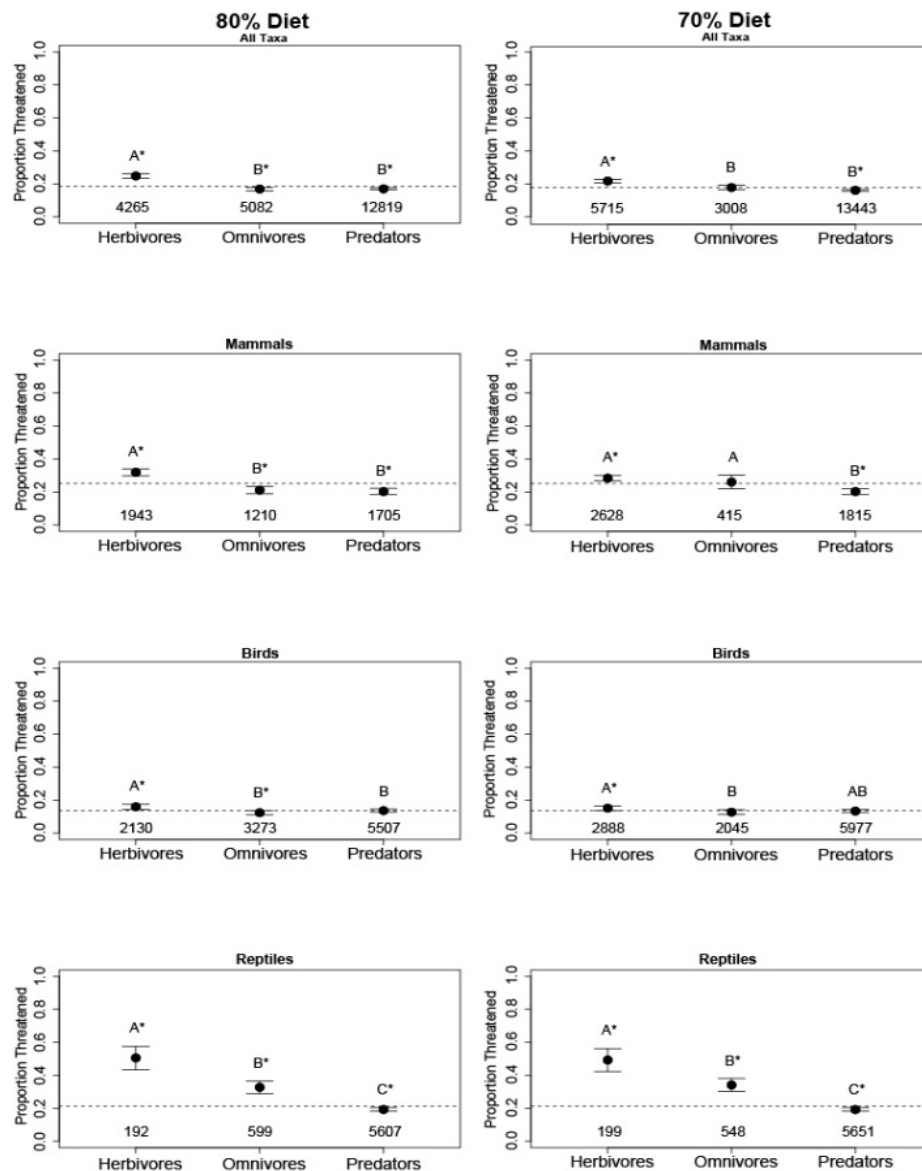

**Fig. S1. Sensitivity analysis for patterns of extinction risk by trophic level.** The mean proportions of threatened vertebrate species ( $\pm$  95% CI) within herbivores, omnivores, and predators summarized for all species combined and within each of these three major taxonomic classes (mammals, birds, and reptiles). The 80% diet defines predators as species that consume a  $\geq$  80% animal-based diet, herbivores as species that consume a  $\geq$  80% plant-based diet, and omnivores as species that consume an 21-79% animal or plant-based diet. The 70% diet defines predators as species that consume a  $\geq$  70% animal-based diet, herbivores as species that consume a  $\geq$  70% plant-based diet, and omnivores as species that consume an 31-69% animal or plant-based diet. Asterisks indicate where the proportions of threatened species are significantly different from the background fraction (dashed horizontal line). Letters indicate the results for comparisons across trophic group using Tukey's post hoc tests. Differing letters indicate significant differences among trophic groups ( $p < 0.05$ ). Numbers indicate sample size.

**Table S1:** Summary statistics for generalized linear models (GLM) and post hoc Tukey's analyses examining trophic group differences in the proportion of species listed as threatened by the IUCN. LR = likelihood ratio test; DF= degrees of freedom.

|                             | <b>DF</b> | <b>LR-Chi<sup>2</sup></b> | <b>P-value</b> |
|-----------------------------|-----------|---------------------------|----------------|
| <b>GLM results</b>          |           |                           |                |
| All species combined        | 2         | 154.06                    | <0.001         |
| Mammals                     | 2         | 69.421                    | <0.001         |
| Birds                       | 2         | 30.736                    | <0.001         |
| Reptiles                    | 2         | 140.77                    | <0.001         |
| <b>Tukey's results</b>      |           |                           |                |
| <i>All species combined</i> |           |                           |                |
| Herbivores: Omnivores       |           |                           | <0.001         |
| Herbivores: Predators       |           |                           | <0.001         |
| Predators: Omnivores        |           |                           | <0.001         |
| <i>Mammals</i>              |           |                           |                |
| Herbivores: Omnivores       |           |                           | <0.001         |
| Herbivores: Predators       |           |                           | <0.001         |
| Predators: Omnivores        |           |                           | 0.871          |
| <i>Birds</i>                |           |                           |                |
| Herbivores: Omnivores       |           |                           | <0.001         |
| Herbivores: Predators       |           |                           | 0.105          |
| Predators: Omnivores        |           |                           | <0.001         |
| <i>Reptiles</i>             |           |                           |                |
| Herbivores: Omnivores       |           |                           | <0.001         |
| Herbivores: Predators       |           |                           | <0.001         |
| Predators: Omnivores        |           |                           | <0.001         |

**Supplementary Table 2:** Summary statistics for trophic groups for all species combined (All), mammals, reptiles, and birds across marine and terrestrial regions. Mean proportion is the proportion listed as threatened ( $\pm$  95% Confidence Intervals) for each region. GLM p-value represents the results from the binomial GLM comparing trophic groups.

| Region         | Taxonomic class | Trophic group | Sample size | Mean proportion | Upper CI | Lower CI | Global proportion | GLM p-value |
|----------------|-----------------|---------------|-------------|-----------------|----------|----------|-------------------|-------------|
| Arctic Sea     | All             | Predator      | 17          | 23.52%          | 43.71%   | 3.33%    | 25.10%            | NA          |
| Arctic Sea     | Mammals         | Predator      | 17          | 23.52%          | 43.71%   | 3.33%    | 25.10%            | NA          |
| Atlantic Ocean | All             | Herbivore     | 3           | 100.00%         | 100.00%  | 99.99%   | 18.41%            | < 0.001     |
| Atlantic Ocean | All             | Omnivore      | 3           | 100.00%         | 100.00%  | 99.99%   | 18.41%            | < 0.001     |
| Atlantic Ocean | All             | Predator      | 70          | 22.86%          | 32.69%   | 13.02%   | 18.41%            | < 0.001     |
| Atlantic Ocean | Mammals         | Herbivore     | 2           | 100.00%         | 100.00%  | 100.00%  | 25.10%            | 0.014       |
| Atlantic Ocean | Mammals         | Predator      | 68          | 20.60%          | 30.20%   | 11.00%   | 25.10%            | 0.014       |
| Atlantic Ocean | Reptiles        | Herbivore     | 1           | 100.00%         | 100.00%  | 100.00%  | 21.40%            | 0.992       |
| Atlantic Ocean | Reptiles        | Omnivore      | 3           | 100.00%         | 100.00%  | 100.00%  | 21.40%            | 0.992       |
| Atlantic Ocean | Reptiles        | Predator      | 2           | 100.00%         | 100.00%  | 100.00%  | 21.40%            | 0.992       |
| Pacific Ocean  | All             | Herbivore     | 3           | 100.00%         | 100.00%  | 99.98%   | 18.41%            | 0.001       |
| Pacific Ocean  | All             | Omnivore      | 2           | 100.00%         | 100.00%  | 99.98%   | 18.41%            | 0.001       |
| Pacific Ocean  | All             | Predator      | 119         | 21.85%          | 29.27%   | 14.42%   | 18.41%            | 0.001       |
| Pacific Ocean  | Mammals         | Herbivore     | 1           | 100.00%         | 100.00%  | 100.00%  | 25.10%            | 0.108       |
| Pacific Ocean  | Mammals         | Predator      | 78          | 26.90%          | 36.80%   | 17.10%   | 25.10%            | 0.108       |
| Pacific Ocean  | Reptiles        | Herbivore     | 2           | 100.00%         | 100.00%  | 100.00%  | 21.40%            | 0.001       |
| Pacific Ocean  | Reptiles        | Omnivore      | 2           | 100.00%         | 100.00%  | 100.00%  | 21.40%            | 0.001       |
| Pacific Ocean  | Reptiles        | Predator      | 41          | 12.20%          | 22.20%   | 2.18%    | 21.40%            | 0.001       |
| Indian Ocean   | All             | Herbivore     | 2           | 100.00%         | 100.00%  | 99.99%   | 18.41%            | 0.002       |
| Indian Ocean   | All             | Omnivore      | 2           | 100.00%         | 100.00%  | 99.99%   | 18.41%            | 0.002       |
| Indian Ocean   | All             | Predator      | 81          | 19.75%          | 28.42%   | 11.08%   | 18.41%            | 0.002       |
| Indian Ocean   | Mammals         | Herbivore     | 1           | 100.00%         | 100.00%  | 100.00%  | 25.10%            | 0.097       |
| Indian Ocean   | Mammals         | Predator      | 45          | 24.40%          | 37.00%   | 11.89%   | 25.10%            | 0.097       |
| Indian Ocean   | Reptiles        | Herbivore     | 1           | 100.00%         | 100.00%  | 100.00%  | 21.40%            | 0.005       |

|                         |          |           |     |         |         |         |        |         |
|-------------------------|----------|-----------|-----|---------|---------|---------|--------|---------|
| Indian Ocean            | Reptiles | Omnivore  | 2   | 100.00% | 100.00% | 100.00% | 21.40% | 0.005   |
| Indian Ocean            | Reptiles | Predator  | 36  | 13.90%  | 25.20%  | 2.59%   | 21.40% | 0.005   |
| Mediterranean/Black Sea | All      | Herbivore | 1   | 100.00% | 100.00% | 99.99%  | 18.41% | 0.036   |
| Mediterranean/Black Sea | All      | Omnivore  | 2   | 100.00% | 100.00% | 99.99%  | 18.41% | 0.036   |
| Mediterranean/Black Sea | All      | Predator  | 15  | 26.67%  | 49.05%  | 4.29%   | 18.41% | 0.036   |
| Mediterranean/Black Sea | Mammals  | Predator  | 14  | 21.43%  | 42.99%  | 0.00%   | 25.10% | NA      |
| Mediterranean/Black Sea | Reptiles | Herbivore | 1   | 100.00% | 100.00% | 100.00% | 21.40% | 1.000   |
| Mediterranean/Black Sea | Reptiles | Omnivore  | 2   | 100.00% | 100.00% | 100.00% | 21.40% | 1.000   |
| Mediterranean/Black Sea | Reptiles | Predator  | 1   | 100.00% | 100.00% | 100.00% | 21.40% | 1.000   |
| Antarctic               | All      | Predator  | 172 | 18.60%  | 24.42%  | 12.79%  | 18.41% | 0.164   |
| Antarctic               | All      | Herbivore | 20  | 10.00%  | 23.15%  | 0.00%   | 18.41% | 0.164   |
| Antarctic               | All      | Omnivore  | 29  | 6.90%   | 16.12%  | 0.00%   | 18.41% | 0.164   |
| Antarctic               | Birds    | Herbivore | 17  | 0.00%   | 0.00%   | 0.00%   | 13.68% | 0.007   |
| Antarctic               | Birds    | Omnivore  | 27  | 3.70%   | 10.80%  | 0.00%   | 13.68% | 0.007   |
| Antarctic               | Birds    | Predator  | 145 | 17.90%  | 24.20%  | 11.70%  | 13.68% | 0.007   |
| Antarctic               | Mammals  | Herbivore | 2   | 50.00%  | 100.00% | 0.00%   | 25.10% | 0.290   |
| Antarctic               | Mammals  | Predator  | 25  | 16.00%  | 30.40%  | 1.60%   | 25.10% | 0.290   |
| Caribbean Islands       | All      | Herbivore | 228 | 18.42%  | 23.45%  | 13.39%  | 18.41% | < 0.001 |
| Caribbean Islands       | All      | Omnivore  | 464 | 10.78%  | 13.60%  | 7.95%   | 18.41% | < 0.001 |
| Caribbean Islands       | All      | Predator  | 867 | 24.91%  | 27.79%  | 22.03%  | 18.41% | < 0.001 |
| Caribbean Islands       | Birds    | Herbivore | 168 | 10.71%  | 15.39%  | 6.04%   | 13.68% | 0.265   |
| Caribbean Islands       | Birds    | Omnivore  | 385 | 7.27%   | 9.87%   | 4.68%   | 13.68% | 0.265   |
| Caribbean Islands       | Birds    | Predator  | 391 | 6.65%   | 9.12%   | 4.18%   | 13.68% | 0.265   |
| Caribbean Islands       | Mammals  | Herbivore | 45  | 24.44%  | 37.00%  | 11.89%  | 25.10% | 0.219   |
| Caribbean Islands       | Mammals  | Omnivore  | 39  | 10.26%  | 19.78%  | 0.74%   | 25.10% | 0.219   |
| Caribbean Islands       | Mammals  | Predator  | 97  | 16.49%  | 23.88%  | 9.11%   | 25.10% | 0.219   |
| Caribbean Islands       | Reptiles | Herbivore | 15  | 86.67%  | 100.00% | 69.46%  | 21.40% | 0.005   |
| Caribbean Islands       | Reptiles | Omnivore  | 40  | 45.00%  | 60.42%  | 29.58%  | 21.40% | 0.005   |
| Caribbean Islands       | Reptiles | Predator  | 379 | 45.91%  | 50.93%  | 40.89%  | 21.40% | 0.005   |
| East Asia               | All      | Herbivore | 396 | 19.70%  | 23.61%  | 15.78%  | 18.41% | < 0.001 |

|             |          |           |      |        |         |        |        |         |
|-------------|----------|-----------|------|--------|---------|--------|--------|---------|
| East Asia   | All      | Omnivore  | 829  | 9.77%  | 11.79%  | 7.75%  | 18.41% | < 0.001 |
| East Asia   | All      | Predator  | 1235 | 12.23% | 14.05%  | 10.40% | 18.41% | < 0.001 |
| East Asia   | Birds    | Herbivore | 161  | 9.32%  | 13.81%  | 4.83%  | 13.68% | 0.321   |
| East Asia   | Birds    | Omnivore  | 659  | 7.59%  | 9.61%   | 5.57%  | 13.68% | 0.321   |
| East Asia   | Birds    | Predator  | 667  | 9.90%  | 12.16%  | 7.63%  | 13.68% | 0.321   |
| East Asia   | Mammals  | Herbivore | 230  | 25.65% | 31.30%  | 20.01% | 25.10% | < 0.001 |
| East Asia   | Mammals  | Omnivore  | 136  | 8.82%  | 13.59%  | 4.06%  | 25.10% | < 0.001 |
| East Asia   | Mammals  | Predator  | 269  | 13.38% | 17.45%  | 9.31%  | 25.10% | < 0.001 |
| East Asia   | Reptiles | Herbivore | 5    | 80.00% | 100.00% | 44.96% | 21.40% | < 0.001 |
| East Asia   | Reptiles | Omnivore  | 34   | 55.88% | 72.57%  | 39.19% | 21.40% | < 0.001 |
| East Asia   | Reptiles | Predator  | 299  | 16.39% | 20.58%  | 12.19% | 21.40% | < 0.001 |
| Europe      | All      | Herbivore | 164  | 14.02% | 19.34%  | 8.71%  | 18.41% | < 0.001 |
| Europe      | All      | Omnivore  | 407  | 5.16%  | 7.31%   | 3.01%  | 18.41% | < 0.001 |
| Europe      | All      | Predator  | 598  | 13.04% | 15.74%  | 10.34% | 18.41% | < 0.001 |
| Europe      | Birds    | Herbivore | 83   | 8.43%  | 14.41%  | 2.46%  | 13.68% | 0.008   |
| Europe      | Birds    | Omnivore  | 350  | 3.71%  | 5.70%   | 1.73%  | 13.68% | 0.008   |
| Europe      | Birds    | Predator  | 356  | 9.27%  | 12.28%  | 6.26%  | 13.68% | 0.008   |
| Europe      | Mammals  | Herbivore | 70   | 14.29% | 22.48%  | 6.09%  | 25.10% | 0.445   |
| Europe      | Mammals  | Omnivore  | 39   | 10.26% | 19.78%  | 0.74%  | 25.10% | 0.445   |
| Europe      | Mammals  | Predator  | 127  | 18.11% | 24.81%  | 11.41% | 25.10% | 0.445   |
| Europe      | Reptiles | Herbivore | 11   | 54.55% | 83.97%  | 25.12% | 21.40% | 0.048   |
| Europe      | Reptiles | Omnivore  | 18   | 22.22% | 41.43%  | 3.02%  | 21.40% | 0.048   |
| Europe      | Reptiles | Predator  | 115  | 19.13% | 26.32%  | 11.94% | 21.40% | 0.048   |
| Mesoamerica | All      | Herbivore | 496  | 15.52% | 18.71%  | 12.34% | 18.41% | 0.021   |
| Mesoamerica | All      | Omnivore  | 879  | 10.35% | 12.37%  | 8.34%  | 18.41% | 0.021   |
| Mesoamerica | All      | Predator  | 1697 | 12.20% | 13.76%  | 10.64% | 18.41% | 0.021   |
| Mesoamerica | Birds    | Herbivore | 265  | 10.94% | 14.70%  | 7.18%  | 13.68% | 0.001   |
| Mesoamerica | Birds    | Omnivore  | 639  | 4.07%  | 5.60%   | 2.54%  | 13.68% | 0.001   |
| Mesoamerica | Birds    | Predator  | 693  | 7.22%  | 9.14%   | 5.29%  | 13.68% | 0.001   |
| Mesoamerica | Mammals  | Herbivore | 211  | 18.01% | 23.19%  | 12.82% | 25.10% | 0.427   |

|               |          |           |     |        |        |        |        |         |
|---------------|----------|-----------|-----|--------|--------|--------|--------|---------|
| Mesoamerica   | Mammals  | Omnivore  | 182 | 21.43% | 27.39% | 15.47% | 25.10% | 0.427   |
| Mesoamerica   | Mammals  | Predator  | 214 | 16.36% | 21.31% | 11.40% | 25.10% | 0.427   |
| Mesoamerica   | Reptiles | Herbivore | 20  | 50.00% | 71.91% | 28.09% | 21.40% | < 0.001 |
| Mesoamerica   | Reptiles | Omnivore  | 58  | 44.83% | 57.63% | 32.03% | 21.40% | < 0.001 |
| Mesoamerica   | Reptiles | Predator  | 790 | 15.44% | 17.96% | 12.92% | 21.40% | < 0.001 |
| North Africa  | All      | Herbivore | 98  | 23.47% | 31.86% | 15.08% | 18.41% | < 0.001 |
| North Africa  | All      | Omnivore  | 311 | 6.75%  | 9.54%  | 3.96%  | 18.41% | < 0.001 |
| North Africa  | All      | Predator  | 503 | 10.74% | 13.44% | 8.03%  | 18.41% | < 0.001 |
| North Africa  | Birds    | Herbivore | 53  | 7.55%  | 14.66% | 0.44%  | 13.68% | 0.347   |
| North Africa  | Birds    | Omnivore  | 248 | 4.84%  | 7.51%  | 2.17%  | 13.68% | 0.347   |
| North Africa  | Birds    | Predator  | 294 | 7.82%  | 10.89% | 4.75%  | 13.68% | 0.347   |
| North Africa  | Mammals  | Herbivore | 35  | 40.00% | 56.23% | 23.77% | 25.10% | < 0.001 |
| North Africa  | Mammals  | Omnivore  | 47  | 6.38%  | 13.37% | 0.00%  | 25.10% | < 0.001 |
| North Africa  | Mammals  | Predator  | 106 | 15.09% | 21.91% | 8.28%  | 25.10% | < 0.001 |
| North Africa  | Reptiles | Herbivore | 10  | 50.00% | 80.99% | 19.01% | 21.40% | 0.010   |
| North Africa  | Reptiles | Omnivore  | 16  | 37.50% | 61.22% | 13.78% | 21.40% | 0.010   |
| North Africa  | Reptiles | Predator  | 103 | 14.56% | 21.38% | 7.75%  | 21.40% | 0.010   |
| North America | All      | Herbivore | 319 | 8.78%  | 11.88% | 5.67%  | 18.41% | 0.318   |
| North America | All      | Omnivore  | 605 | 10.58% | 13.03% | 8.13%  | 18.41% | 0.318   |
| North America | All      | Predator  | 902 | 11.75% | 13.85% | 9.65%  | 18.41% | 0.318   |
| North America | Birds    | Herbivore | 132 | 6.82%  | 11.12% | 2.52%  | 13.68% | 0.035   |
| North America | Birds    | Omnivore  | 448 | 9.15%  | 11.82% | 6.48%  | 13.68% | 0.035   |
| North America | Birds    | Predator  | 448 | 13.39% | 16.55% | 10.24% | 13.68% | 0.035   |
| North America | Mammals  | Herbivore | 175 | 8.57%  | 12.72% | 4.42%  | 25.10% | 0.455   |
| North America | Mammals  | Omnivore  | 111 | 9.01%  | 14.34% | 3.68%  | 25.10% | 0.455   |
| North America | Mammals  | Predator  | 160 | 12.50% | 17.62% | 7.38%  | 25.10% | 0.455   |
| North America | Reptiles | Herbivore | 12  | 33.33% | 60.01% | 6.66%  | 21.40% | < 0.001 |
| North America | Reptiles | Omnivore  | 46  | 28.26% | 41.27% | 15.25% | 21.40% | < 0.001 |
| North America | Reptiles | Predator  | 294 | 8.84%  | 12.09% | 5.60%  | 21.40% | < 0.001 |
| North Asia    | All      | Herbivore | 180 | 11.11% | 15.70% | 6.52%  | 18.41% | 0.009   |

|               |          |           |      |         |         |        |        |         |
|---------------|----------|-----------|------|---------|---------|--------|--------|---------|
| North Asia    | All      | Omnivore  | 373  | 6.43%   | 8.92%   | 3.94%  | 18.41% | 0.009   |
| North Asia    | All      | Predator  | 548  | 12.41%  | 15.17%  | 9.65%  | 18.41% | 0.009   |
| North Asia    | Birds    | Herbivore | 68   | 7.35%   | 13.56%  | 1.15%  | 13.68% | 0.059   |
| North Asia    | Birds    | Omnivore  | 309  | 6.15%   | 8.83%   | 3.47%  | 13.68% | 0.059   |
| North Asia    | Birds    | Predator  | 345  | 11.30%  | 14.65%  | 7.96%  | 13.68% | 0.059   |
| North Asia    | Mammals  | Herbivore | 110  | 11.82%  | 17.85%  | 5.79%  | 25.10% | 0.428   |
| North Asia    | Mammals  | Omnivore  | 61   | 8.20%   | 15.08%  | 1.31%  | 25.10% | 0.428   |
| North Asia    | Mammals  | Predator  | 145  | 14.48%  | 20.21%  | 8.75%  | 25.10% | 0.428   |
| North Asia    | Reptiles | Herbivore | 2    | 100.00% | 100.00% | 99.99% | 21.40% | 0.014   |
| North Asia    | Reptiles | Omnivore  | 3    | 0.00%   | 0.01%   | 0%     | 21.40% | 0.014   |
| North Asia    | Reptiles | Predator  | 58   | 13.79%  | 22.67%  | 4.92%  | 21.40% | 0.014   |
| Oceania       | All      | Herbivore | 538  | 23.42%  | 27.00%  | 19.84% | 18.41% | < 0.001 |
| Oceania       | All      | Omnivore  | 964  | 14.42%  | 16.64%  | 12.20% | 18.41% | < 0.001 |
| Oceania       | All      | Predator  | 2198 | 14.97%  | 16.46%  | 13.48% | 18.41% | < 0.001 |
| Oceania       | Birds    | Herbivore | 299  | 14.38%  | 18.36%  | 10.40% | 13.68% | < 0.001 |
| Oceania       | Birds    | Omnivore  | 697  | 9.61%   | 11.80%  | 7.42%  | 13.68% | < 0.001 |
| Oceania       | Birds    | Predator  | 818  | 17.85%  | 20.47%  | 15.22% | 13.68% | < 0.001 |
| Oceania       | Mammals  | Herbivore | 226  | 34.07%  | 40.25%  | 27.89% | 25.10% | < 0.001 |
| Oceania       | Mammals  | Omnivore  | 98   | 21.43%  | 29.55%  | 13.30% | 25.10% | < 0.001 |
| Oceania       | Mammals  | Predator  | 236  | 16.53%  | 21.26%  | 11.79% | 25.10% | < 0.001 |
| Oceania       | Reptiles | Herbivore | 13   | 46.15%  | 73.25%  | 19.05% | 21.40% | < 0.001 |
| Oceania       | Reptiles | Omnivore  | 169  | 30.18%  | 37.10%  | 23.26% | 21.40% | < 0.001 |
| Oceania       | Reptiles | Predator  | 1144 | 12.59%  | 14.51%  | 10.67% | 21.40% | < 0.001 |
| South America | All      | Herbivore | 1170 | 19.83%  | 22.11%  | 17.54% | 18.41% | < 0.001 |
| South America | All      | Omnivore  | 1707 | 12.83%  | 14.42%  | 11.24% | 18.41% | < 0.001 |
| South America | All      | Predator  | 3030 | 13.17%  | 14.37%  | 11.96% | 18.41% | < 0.001 |
| South America | Birds    | Herbivore | 719  | 17.25%  | 20.01%  | 14.48% | 13.68% | < 0.001 |
| South America | Birds    | Omnivore  | 1106 | 10.13%  | 11.90%  | 8.35%  | 13.68% | < 0.001 |
| South America | Birds    | Predator  | 1787 | 12.14%  | 13.66%  | 10.63% | 13.68% | < 0.001 |
| South America | Mammals  | Herbivore | 371  | 20.75%  | 24.88%  | 16.63% | 25.10% | 0.292   |



|                          |          |           |      |        |         |        |        |         |
|--------------------------|----------|-----------|------|--------|---------|--------|--------|---------|
| South America            | Mammals  | Omnivore  | 459  | 19.39% | 23.01%  | 15.77% | 25.10% | 0.292   |
| South America            | Mammals  | Predator  | 258  | 15.89% | 20.35%  | 11.43% | 25.10% | 0.292   |
| South America            | Reptiles | Herbivore | 80   | 38.75% | 49.43%  | 28.07% | 21.40% | < 0.001 |
| South America            | Reptiles | Omnivore  | 142  | 12.68% | 18.15%  | 7.20%  | 21.40% | < 0.001 |
| South America            | Reptiles | Predator  | 985  | 14.31% | 16.50%  | 12.13% | 21.40% | < 0.001 |
| South and Southeast Asia | All      | Herbivore | 934  | 30.09% | 33.03%  | 27.14% | 18.41% | < 0.001 |
| South and Southeast Asia | All      | Omnivore  | 1640 | 15.49% | 17.24%  | 13.74% | 18.41% | < 0.001 |
| South and Southeast Asia | All      | Predator  | 3003 | 14.85% | 16.12%  | 13.58% | 18.41% | < 0.001 |
| South and Southeast Asia | Birds    | Herbivore | 479  | 14.61% | 17.78%  | 11.45% | 13.68% | 0.099   |
| South and Southeast Asia | Birds    | Omnivore  | 1266 | 10.82% | 12.53%  | 9.11%  | 13.68% | 0.099   |
| South and Southeast Asia | Birds    | Predator  | 1453 | 12.04% | 13.72%  | 10.37% | 13.68% | 0.099   |
| South and Southeast Asia | Mammals  | Herbivore | 433  | 44.34% | 49.02%  | 39.66% | 25.10% | < 0.001 |
| South and Southeast Asia | Mammals  | Omnivore  | 288  | 26.39% | 31.48%  | 21.30% | 25.10% | < 0.001 |
| South and Southeast Asia | Mammals  | Predator  | 431  | 20.19% | 23.98%  | 16.40% | 25.10% | < 0.001 |
| South and Southeast Asia | Reptiles | Herbivore | 22   | 86.36% | 100.00% | 72.03% | 21.40% | < 0.001 |
| South and Southeast Asia | Reptiles | Omnivore  | 86   | 47.67% | 58.23%  | 37.12% | 21.40% | < 0.001 |
| South and Southeast Asia | Reptiles | Predator  | 1119 | 16.44% | 18.62%  | 14.27% | 21.40% | < 0.001 |
| Sub-Saharan Africa       | All      | Herbivore | 718  | 27.16% | 30.41%  | 23.91% | 18.41% | < 0.001 |
| Sub-Saharan Africa       | All      | Omnivore  | 1374 | 13.17% | 14.96%  | 11.38% | 18.41% | < 0.001 |
| Sub-Saharan Africa       | All      | Predator  | 2554 | 18.29% | 19.78%  | 16.79% | 18.41% | < 0.001 |
| Sub-Saharan Africa       | Birds    | Herbivore | 255  | 8.63%  | 12.07%  | 5.18%  | 13.68% | 0.007   |
| Sub-Saharan Africa       | Birds    | Omnivore  | 1001 | 9.19%  | 10.98%  | 7.40%  | 13.68% | 0.007   |
| Sub-Saharan Africa       | Birds    | Predator  | 1203 | 13.05% | 14.95%  | 11.15% | 13.68% | 0.007   |
| Sub-Saharan Africa       | Mammals  | Herbivore | 442  | 36.65% | 41.14%  | 32.16% | 25.10% | < 0.001 |
| Sub-Saharan Africa       | Mammals  | Omnivore  | 271  | 19.19% | 23.88%  | 14.50% | 25.10% | < 0.001 |
| Sub-Saharan Africa       | Mammals  | Predator  | 509  | 20.63% | 24.14%  | 17.11% | 25.10% | < 0.001 |
| Sub-Saharan Africa       | Reptiles | Herbivore | 21   | 52.38% | 73.74%  | 31.02% | 21.40% | 0.002   |
| Sub-Saharan Africa       | Reptiles | Omnivore  | 102  | 36.27% | 45.61%  | 26.94% | 21.40% | 0.002   |
| Sub-Saharan Africa       | Reptiles | Predator  | 842  | 24.35% | 27.25%  | 21.45% | 21.40% | 0.002   |
| West and Central Asia    | All      | Herbivore | 289  | 14.88% | 18.98%  | 10.78% | 18.41% | < 0.001 |

|                       |          |           |      |        |        |        |        |         |
|-----------------------|----------|-----------|------|--------|--------|--------|--------|---------|
| West and Central Asia | All      | Omnivore  | 630  | 6.67%  | 8.61%  | 4.72%  | 18.41% | < 0.001 |
| West and Central Asia | All      | Predator  | 1009 | 11.10% | 13.04% | 9.16%  | 18.41% | < 0.001 |
| West and Central Asia | Birds    | Herbivore | 126  | 5.56%  | 9.56%  | 1.56%  | 13.68% | 0.095   |
| West and Central Asia | Birds    | Omnivore  | 466  | 4.72%  | 6.65%  | 2.80%  | 13.68% | 0.095   |
| West and Central Asia | Birds    | Predator  | 495  | 8.08%  | 10.48% | 5.68%  | 13.68% | 0.095   |
| West and Central Asia | Mammals  | Herbivore | 148  | 19.59% | 25.99% | 13.20% | 25.10% | 0.009   |
| West and Central Asia | Mammals  | Omnivore  | 127  | 7.09%  | 11.55% | 2.62%  | 25.10% | 0.009   |
| West and Central Asia | Mammals  | Predator  | 183  | 14.21% | 19.27% | 9.15%  | 25.10% | 0.009   |
| West and Central Asia | Reptiles | Herbivore | 15   | 46.67% | 71.91% | 21.42% | 21.40% | 0.001   |
| West and Central Asia | Reptiles | Omnivore  | 37   | 29.73% | 44.46% | 15.00% | 21.40% | 0.001   |
| West and Central Asia | Reptiles | Predator  | 331  | 13.90% | 17.62% | 10.17% | 21.40% | 0.001   |

**Supplementary Table 3:** Summary statistics for trophic groups for all species combined (All), mammals, reptiles, and birds across terrestrial and aquatic habitats. Mean proportion is the proportion listed as threatened ( $\pm$  95% Confidence Intervals) for each habitat. GLM p-value represents the results from the binomial GLM comparing trophic groups.

| Habitat type | Taxonomic class | Trophic group | Sample size | Mean proportion | Upper CI | Lower CI | Background fraction | GLM p-value |
|--------------|-----------------|---------------|-------------|-----------------|----------|----------|---------------------|-------------|
| Caves        | All             | Herbivore     | 77          | 24.68%          | 34.30%   | 15.05%   | 18.41%              | 0.700       |
| Caves        | All             | Omnivore      | 57          | 19.30%          | 29.54%   | 9.05%    | 18.41%              | 0.700       |
| Caves        | All             | Predator      | 472         | 20.76%          | 24.42%   | 17.10%   | 18.41%              | 0.700       |
| Caves        | Birds           | Herbivore     | 11          | 9.09%           | 26.08%   | 0.00%    | 13.68%              | 0.769       |
| Caves        | Birds           | Omnivore      | 1           | 0.00%           | 0.03%    | 0.00%    | 13.68%              | 0.769       |
| Caves        | Birds           | Predator      | 34          | 14.71%          | 26.61%   | 2.80%    | 13.68%              | 0.769       |
| Caves        | Mammals         | Herbivore     | 64          | 25.00%          | 35.61%   | 14.39%   | 25.10%              | 0.383       |
| Caves        | Mammals         | Omnivore      | 55          | 20.00%          | 30.57%   | 9.43%    | 25.10%              | 0.383       |
| Caves        | Mammals         | Predator      | 337         | 17.51%          | 21.56%   | 13.45%   | 25.10%              | 0.383       |
| Caves        | Reptiles        | Herbivore     | 2           | 100.00%         | 100.00%  | 99.98%   | 21.40%              | 0.077       |
| Caves        | Reptiles        | Omnivore      | 1           | 0.00%           | 0.03%    | 0.00%    | 21.40%              | 0.077       |
| Caves        | Reptiles        | Predator      | 101         | 33.66%          | 42.88%   | 24.45%   | 21.40%              | 0.077       |
| Desert       | All             | Herbivore     | 206         | 19.42%          | 24.82%   | 14.02%   | 18.41%              | 0.000       |
| Desert       | All             | Omnivore      | 304         | 8.88%           | 12.08%   | 5.68%    | 18.41%              | 0.000       |
| Desert       | All             | Predator      | 690         | 8.70%           | 10.80%   | 6.59%    | 18.41%              | 0.000       |
| Desert       | Birds           | Herbivore     | 42          | 9.52%           | 18.40%   | 0.65%    | 13.68%              | 0.378       |
| Desert       | Birds           | Omnivore      | 84          | 4.76%           | 9.32%    | 0.21%    | 13.68%              | 0.378       |
| Desert       | Birds           | Predator      | 113         | 9.73%           | 15.20%   | 4.27%    | 13.68%              | 0.378       |
| Desert       | Mammals         | Herbivore     | 150         | 19.33%          | 25.65%   | 13.01%   | 25.10%              | 0.038       |
| Desert       | Mammals         | Omnivore      | 144         | 12.50%          | 17.90%   | 7.10%    | 25.10%              | 0.038       |
| Desert       | Mammals         | Predator      | 124         | 8.87%           | 13.88%   | 3.87%    | 25.10%              | 0.038       |
| Desert       | Reptiles        | Herbivore     | 14          | 50.00%          | 76.19%   | 23.81%   | 21.40%              | 0.000       |
| Desert       | Reptiles        | Omnivore      | 76          | 6.58%           | 12.15%   | 1.01%    | 21.40%              | 0.000       |
| Desert       | Reptiles        | Predator      | 453         | 8.39%           | 10.94%   | 5.84%    | 21.40%              | 0.000       |
| Forest       | All             | Herbivore     | 2892        | 27.39%          | 29.01%   | 25.76%   | 18.41%              | 0.000       |

|           |          |           |      |        |        |        |        |       |
|-----------|----------|-----------|------|--------|--------|--------|--------|-------|
| Forest    | All      | Omnivore  | 4524 | 15.38% | 16.44% | 14.33% | 18.41% | 0.000 |
| Forest    | All      | Predator  | 8805 | 17.40% | 18.19% | 16.61% | 18.41% | 0.000 |
| Forest    | Birds    | Herbivore | 1499 | 18.55% | 20.51% | 16.58% | 13.68% | 0.000 |
| Forest    | Birds    | Omnivore  | 3215 | 11.38% | 12.48% | 10.29% | 13.68% | 0.000 |
| Forest    | Birds    | Predator  | 3752 | 13.94% | 15.05% | 12.83% | 13.68% | 0.000 |
| Forest    | Mammals  | Herbivore | 1340 | 35.45% | 38.01% | 32.89% | 25.10% | 0.000 |
| Forest    | Mammals  | Omnivore  | 1036 | 23.75% | 26.34% | 21.15% | 25.10% | 0.000 |
| Forest    | Mammals  | Predator  | 1215 | 19.84% | 22.08% | 17.59% | 25.10% | 0.000 |
| Forest    | Reptiles | Herbivore | 53   | 73.58% | 85.45% | 61.72% | 21.40% | 0.000 |
| Forest    | Reptiles | Omnivore  | 273  | 30.77% | 36.24% | 25.29% | 21.40% | 0.000 |
| Forest    | Reptiles | Predator  | 3838 | 20.01% | 21.28% | 18.74% | 21.40% | 0.000 |
| Grassland | All      | Herbivore | 924  | 16.45% | 18.84% | 14.06% | 18.41% | 0.005 |
| Grassland | All      | Omnivore  | 1421 | 12.39% | 14.10% | 10.67% | 18.41% | 0.005 |
| Grassland | All      | Predator  | 2254 | 12.29% | 13.64% | 10.93% | 18.41% | 0.005 |
| Grassland | Birds    | Herbivore | 350  | 9.14%  | 12.16% | 6.12%  | 13.68% | 0.290 |
| Grassland | Birds    | Omnivore  | 910  | 10.66% | 12.66% | 8.65%  | 13.68% | 0.290 |
| Grassland | Birds    | Predator  | 936  | 12.07% | 14.16% | 9.99%  | 13.68% | 0.290 |
| Grassland | Mammals  | Herbivore | 543  | 20.44% | 23.83% | 17.05% | 25.10% | 0.021 |
| Grassland | Mammals  | Omnivore  | 379  | 13.46% | 16.89% | 10.02% | 25.10% | 0.021 |
| Grassland | Mammals  | Predator  | 348  | 17.53% | 21.52% | 13.53% | 25.10% | 0.021 |
| Grassland | Reptiles | Herbivore | 31   | 29.03% | 45.01% | 13.05% | 21.40% | 0.000 |
| Grassland | Reptiles | Omnivore  | 132  | 21.21% | 28.19% | 14.24% | 21.40% | 0.000 |
| Grassland | Reptiles | Predator  | 970  | 10.62% | 12.56% | 8.68%  | 21.40% | 0.000 |
| Rocky     | All      | Herbivore | 328  | 20.12% | 24.46% | 15.78% | 18.41% | 0.000 |
| Rocky     | All      | Omnivore  | 412  | 8.74%  | 11.46% | 6.01%  | 18.41% | 0.000 |
| Rocky     | All      | Predator  | 1218 | 15.85% | 17.90% | 13.79% | 18.41% | 0.000 |
| Rocky     | Birds    | Herbivore | 66   | 3.03%  | 7.17%  | 0.00%  | 13.68% | 0.010 |
| Rocky     | Birds    | Omnivore  | 194  | 5.67%  | 8.92%  | 2.42%  | 13.68% | 0.010 |
| Rocky     | Birds    | Predator  | 277  | 11.91% | 15.73% | 8.10%  | 13.68% | 0.010 |
| Rocky     | Mammals  | Herbivore | 209  | 24.40% | 30.22% | 18.58% | 25.10% | 0.000 |

|           |          |           |      |        |        |        |        |       |
|-----------|----------|-----------|------|--------|--------|--------|--------|-------|
| Rocky     | Mammals  | Omnivore  | 104  | 5.77%  | 10.25% | 1.29%  | 25.10% | 0.000 |
| Rocky     | Mammals  | Predator  | 129  | 11.63% | 17.16% | 6.10%  | 25.10% | 0.000 |
| Rocky     | Reptiles | Herbivore | 53   | 24.53% | 36.11% | 12.94% | 21.40% | 0.459 |
| Rocky     | Reptiles | Omnivore  | 114  | 16.67% | 23.51% | 9.83%  | 21.40% | 0.459 |
| Rocky     | Reptiles | Predator  | 812  | 17.86% | 20.49% | 15.22% | 21.40% | 0.459 |
| Savanna   | All      | Herbivore | 617  | 13.61% | 16.32% | 10.91% | 18.41% | 0.000 |
| Savanna   | All      | Omnivore  | 1116 | 5.56%  | 6.90%  | 4.21%  | 18.41% | 0.000 |
| Savanna   | All      | Predator  | 1871 | 5.88%  | 6.95%  | 4.81%  | 18.41% | 0.000 |
| Savanna   | Birds    | Herbivore | 341  | 9.38%  | 12.48% | 6.29%  | 13.68% | 0.006 |
| Savanna   | Birds    | Omnivore  | 848  | 4.36%  | 5.74%  | 2.99%  | 13.68% | 0.006 |
| Savanna   | Birds    | Predator  | 859  | 6.05%  | 7.65%  | 4.46%  | 13.68% | 0.006 |
| Savanna   | Mammals  | Herbivore | 269  | 19.33% | 24.05% | 14.61% | 25.10% | 0.001 |
| Savanna   | Mammals  | Omnivore  | 202  | 10.40% | 14.61% | 6.19%  | 25.10% | 0.001 |
| Savanna   | Mammals  | Predator  | 311  | 9.00%  | 12.18% | 5.82%  | 25.10% | 0.001 |
| Savanna   | Reptiles | Herbivore | 7    | 0.00%  | 0.01%  | 0.00%  | 21.40% | 0.594 |
| Savanna   | Reptiles | Omnivore  | 66   | 6.06%  | 11.82% | 0.30%  | 21.40% | 0.594 |
| Savanna   | Reptiles | Predator  | 701  | 4.28%  | 5.78%  | 2.78%  | 21.40% | 0.594 |
| Shrubland | All      | Herbivore | 1367 | 17.70% | 19.73% | 15.68% | 18.41% | 0.000 |
| Shrubland | All      | Omnivore  | 2673 | 10.25% | 11.40% | 9.10%  | 18.41% | 0.000 |
| Shrubland | All      | Predator  | 3857 | 11.46% | 12.46% | 10.45% | 18.41% | 0.000 |
| Shrubland | Birds    | Herbivore | 742  | 10.65% | 12.87% | 8.43%  | 13.68% | 0.184 |
| Shrubland | Birds    | Omnivore  | 1964 | 8.40%  | 9.63%  | 7.17%  | 13.68% | 0.184 |
| Shrubland | Birds    | Predator  | 1758 | 9.39%  | 10.75% | 8.02%  | 13.68% | 0.184 |
| Shrubland | Mammals  | Herbivore | 555  | 21.62% | 25.05% | 18.20% | 25.10% | 0.000 |
| Shrubland | Mammals  | Omnivore  | 477  | 12.16% | 15.09% | 9.23%  | 25.10% | 0.000 |
| Shrubland | Mammals  | Predator  | 434  | 14.98% | 18.33% | 11.62% | 25.10% | 0.000 |
| Shrubland | Reptiles | Herbivore | 70   | 61.43% | 72.83% | 50.03% | 21.40% | 0.000 |
| Shrubland | Reptiles | Omnivore  | 232  | 21.98% | 27.31% | 16.65% | 21.40% | 0.000 |
| Shrubland | Reptiles | Predator  | 1665 | 12.73% | 14.33% | 11.13% | 21.40% | 0.000 |
| Wetland   | All      | Herbivore | 353  | 18.41% | 22.46% | 14.37% | 18.41% | 0.068 |

|                   |          |           |      |        |        |        |        |       |
|-------------------|----------|-----------|------|--------|--------|--------|--------|-------|
| Wetland           | All      | Omnivore  | 924  | 13.31% | 15.50% | 11.12% | 18.41% | 0.068 |
| Wetland           | All      | Predator  | 1866 | 14.04% | 15.62% | 12.46% | 18.41% | 0.068 |
| Wetland           | Birds    | Herbivore | 196  | 7.14%  | 10.75% | 3.54%  | 13.68% | 0.119 |
| Wetland           | Birds    | Omnivore  | 755  | 10.60% | 12.79% | 8.40%  | 13.68% | 0.119 |
| Wetland           | Birds    | Predator  | 1203 | 11.80% | 13.63% | 9.98%  | 13.68% | 0.119 |
| Wetland           | Mammals  | Herbivore | 144  | 29.17% | 36.59% | 21.74% | 25.10% | 0.008 |
| Wetland           | Mammals  | Omnivore  | 101  | 12.87% | 19.40% | 6.34%  | 25.10% | 0.008 |
| Wetland           | Mammals  | Predator  | 193  | 22.28% | 28.15% | 16.41% | 25.10% | 0.008 |
| Wetland           | Reptiles | Herbivore | 13   | 69.23% | 94.32% | 44.14% | 21.40% | 0.000 |
| Wetland           | Reptiles | Omnivore  | 68   | 44.12% | 55.92% | 32.32% | 21.40% | 0.000 |
| Wetland           | Reptiles | Predator  | 470  | 16.38% | 19.73% | 13.04% | 21.40% | 0.000 |
| Marine Coastal    | All      | Herbivore | 60   | 40.00% | 52.40% | 27.60% | 18.41% | 0.006 |
| Marine Coastal    | All      | Omnivore  | 168  | 26.79% | 33.48% | 20.09% | 18.41% | 0.006 |
| Marine Coastal    | All      | Predator  | 642  | 21.65% | 24.84% | 18.47% | 18.41% | 0.006 |
| Marine Coastal    | Birds    | Herbivore | 28   | 14.29% | 27.25% | 1.32%  | 13.68% | 0.724 |
| Marine Coastal    | Birds    | Omnivore  | 108  | 18.52% | 25.84% | 11.19% | 13.68% | 0.724 |
| Marine Coastal    | Birds    | Predator  | 375  | 20.00% | 24.05% | 15.95% | 13.68% | 0.724 |
| Marine Coastal    | Mammals  | Herbivore | 19   | 63.16% | 84.85% | 41.47% | 25.10% | 0.023 |
| Marine Coastal    | Mammals  | Omnivore  | 19   | 21.05% | 39.38% | 2.72%  | 25.10% | 0.023 |
| Marine Coastal    | Mammals  | Predator  | 64   | 35.94% | 47.69% | 24.18% | 25.10% | 0.023 |
| Marine Coastal    | Reptiles | Herbivore | 13   | 61.54% | 87.99% | 35.09% | 21.40% | 0.000 |
| Marine Coastal    | Reptiles | Omnivore  | 41   | 51.22% | 66.52% | 35.92% | 21.40% | 0.000 |
| Marine Coastal    | Reptiles | Predator  | 203  | 20.20% | 25.72% | 14.67% | 21.40% | 0.000 |
| Marine Intertidal | All      | Herbivore | 43   | 34.88% | 49.13% | 20.64% | 18.41% | 0.083 |
| Marine Intertidal | All      | Omnivore  | 169  | 21.30% | 27.47% | 15.13% | 18.41% | 0.083 |
| Marine Intertidal | All      | Predator  | 499  | 19.64% | 23.12% | 16.15% | 18.41% | 0.083 |
| Marine Intertidal | Birds    | Herbivore | 23   | 8.70%  | 20.20% | 0.00%  | 13.68% | 0.276 |
| Marine Intertidal | Birds    | Omnivore  | 129  | 12.40% | 18.00% | 6.70%  | 13.68% | 0.276 |
| Marine Intertidal | Birds    | Predator  | 358  | 17.00% | 20.90% | 13.10% | 13.68% | 0.276 |
| Marine Intertidal | Mammals  | Herbivore | 12   | 50.00% | 78.30% | 21.70% | 25.10% | 0.627 |

|                   |          |           |     |         |         |         |        |       |
|-------------------|----------|-----------|-----|---------|---------|---------|--------|-------|
| Marine Intertidal | Mammals  | Omnivore  | 10  | 30.00%  | 58.40%  | 1.60%   | 25.10% | 0.627 |
| Marine Intertidal | Mammals  | Predator  | 46  | 39.10%  | 53.20%  | 25.00%  | 25.10% | 0.627 |
| Marine Intertidal | Reptiles | Herbivore | 8   | 87.50%  | 100.00% | 64.60%  | 21.40% | 0.000 |
| Marine Intertidal | Reptiles | Omnivore  | 30  | 56.67%  | 74.50%  | 38.90%  | 21.40% | 0.000 |
| Marine Intertidal | Reptiles | Predator  | 95  | 20.00%  | 28.00%  | 12.00%  | 21.40% | 0.000 |
| Marine Neritic    | All      | Herbivore | 26  | 38.46%  | 57.16%  | 19.76%  | 18.41% | 0.176 |
| Marine Neritic    | All      | Omnivore  | 70  | 20.00%  | 29.37%  | 10.63%  | 18.41% | 0.176 |
| Marine Neritic    | All      | Predator  | 610 | 27.21%  | 30.74%  | 23.68%  | 18.41% | 0.176 |
| Marine Neritic    | Birds    | Herbivore | 15  | 6.67%   | 19.29%  | 0.00%   | 13.68% | 0.005 |
| Marine Neritic    | Birds    | Omnivore  | 63  | 12.70%  | 20.92%  | 4.48%   | 13.68% | 0.005 |
| Marine Neritic    | Birds    | Predator  | 448 | 27.46%  | 31.59%  | 23.32%  | 13.68% | 0.005 |
| Marine Neritic    | Mammals  | Herbivore | 6   | 83.33%  | 100.00% | 53.51%  | 25.10% | 0.017 |
| Marine Neritic    | Mammals  | Omnivore  | 1   | 100.00% | 100.00% | 99.95%  | 25.10% | 0.017 |
| Marine Neritic    | Mammals  | Predator  | 100 | 33.00%  | 42.22%  | 23.78%  | 25.10% | 0.017 |
| Marine Neritic    | Reptiles | Herbivore | 5   | 80.00%  | 100.00% | 44.94%  | 21.40% | 0.000 |
| Marine Neritic    | Reptiles | Omnivore  | 6   | 83.33%  | 100.00% | 53.51%  | 21.40% | 0.000 |
| Marine Neritic    | Reptiles | Predator  | 62  | 16.13%  | 25.28%  | 6.97%   | 21.40% | 0.000 |
| Marine Oceanic    | All      | Herbivore | 3   | 100.00% | 100.03% | 99.97%  | 18.41% | 0.047 |
| Marine Oceanic    | All      | Omnivore  | 10  | 40.00%  | 70.36%  | 9.64%   | 18.41% | 0.047 |
| Marine Oceanic    | All      | Predator  | 311 | 36.01%  | 41.35%  | 30.68%  | 18.41% | 0.047 |
| Marine Oceanic    | Birds    | Omnivore  | 7   | 14.30%  | 40.20%  | 0.00%   | 13.68% | 0.151 |
| Marine Oceanic    | Birds    | Predator  | 224 | 39.30%  | 45.70%  | 32.90%  | 13.68% | 0.151 |
| Marine Oceanic    | Mammals  | Herbivore | 1   | 100.00% | 100.00% | 100.00% | 25.10% | 0.104 |
| Marine Oceanic    | Mammals  | Predator  | 84  | 26.20%  | 35.60%  | 16.80%  | 25.10% | 0.104 |
| Marine Oceanic    | Reptiles | Herbivore | 2   | 100.00% | 100.00% | 100.00% | 21.40% | 0.331 |
| Marine Oceanic    | Reptiles | Omnivore  | 3   | 100.00% | 100.00% | 100.00% | 21.40% | 0.331 |
| Marine Oceanic    | Reptiles | Predator  | 3   | 67.00%  | 100.00% | 13.00%  | 21.40% | 0.331 |

Table S4: Summary statistics for generalized linear models (GLM) and post hoc Tukey's analyses examining trophic group differences in the proportion of species listed as extinct. Mammals, Birds, Reptiles, and All species combined represent contemporary extinction in the last 500 years. LR = likelihood ratio test; DF= degrees of freedom

|                             | <b>DF</b> | <b>LR-Chi<sup>2</sup></b> | <b>P-value</b> |
|-----------------------------|-----------|---------------------------|----------------|
| <b>GLM results</b>          |           |                           |                |
| All species combined        | 2         | 76.004                    | <0.001         |
| Pleistocene Mammals         | 2         | 239.77                    | <0.001         |
| Mammals                     | 2         | 12.214                    | 0.002          |
| Birds                       | 2         | 19.287                    | <0.001         |
| Reptiles                    | 2         | 30.275                    | <0.001         |
| <b>Tukey's results</b>      |           |                           |                |
| <i>All species combined</i> |           |                           |                |
| Herbivores:                 |           |                           |                |
| Omnivores                   |           |                           | <0.001         |
| Herbivores: Predators       |           |                           |                |
|                             |           |                           | <0.001         |
| Predators: Omnivores        |           |                           |                |
|                             |           |                           | <0.001         |
| <i>Pleistocene Mammals</i>  |           |                           |                |
| Herbivores:                 |           |                           |                |
| Omnivores                   |           |                           | <0.001         |
| Herbivores: Predators       |           |                           |                |
|                             |           |                           | <0.001         |
| Predators: Omnivores        |           |                           |                |
|                             |           |                           | 0.363          |
| <i>Mammals</i>              |           |                           |                |
| Herbivores:                 |           |                           |                |
| Omnivores                   |           |                           | 0.076          |
| Herbivores: Predators       |           |                           |                |
|                             |           |                           | 0.004          |
| Predators: Omnivores        |           |                           |                |
|                             |           |                           | 0.581          |
| <i>Birds</i>                |           |                           |                |
| Herbivores:                 |           |                           |                |
| Omnivores                   |           |                           | <0.001         |
| Herbivores: Predators       |           |                           |                |
|                             |           |                           | <0.001         |
| Predators: Omnivores        |           |                           |                |
|                             |           |                           | 0.892          |
| <i>Reptiles</i>             |           |                           |                |
| Herbivores:                 |           |                           |                |
| Omnivores                   |           |                           | 0.038          |
| Herbivores: Predators       |           |                           |                |
|                             |           |                           | <0.001         |
| Predators: Omnivores        |           |                           |                |
|                             |           |                           | 0.003          |



Table S5: Summary statistics for phylogenetic generalized linear models examining the independent and interactive effects of trophic group (herbivore, omnivore, or predator) and body mass on extinction risk in mammals, birds, and reptiles. All coefficients are the averages of models fit across 1000 phylogenies; the exception is  $\alpha$  (which measures the strength of phylogenetic signal; (36)), whose ‘Estimate’ is the mean across the phylogenies and the ‘SE’ the standard error of that mean .

|                                      | <b>Estimate</b> | <b>SE</b> | <b>z-score</b> | <b>P-value</b> |
|--------------------------------------|-----------------|-----------|----------------|----------------|
| <i>Mammals</i>                       |                 |           |                |                |
| (Intercept)                          | -0.969          | 0.194     | -5.488         | <0.001         |
| Trophic Level_Omnivore               | -0.268          | 0.116     | -2.199         | 0.550          |
| Trophic Level_Predator               | -1.356          | 0.156     | -8.538         | <0.001         |
| Log Body Mass                        | 0.248           | 0.053     | 4.982          | <0.001         |
| $\alpha$                             | 0.081           | <0.001    |                |                |
| <i>Birds</i>                         |                 |           |                |                |
| (Intercept)                          | -2.864          | 0.213     | -13.486        | <0.001         |
| Trophic Level_Omnivore               | -0.600          | 0.275     | -2.177         | 0.057          |
| Trophic Level_Predator               | -0.008          | 0.253     | -0.028         | 0.541          |
| Log Body Mass                        | 0.676           | 0.095     | 7.122          | <0.001         |
| Trophic Level_Omnivore:Log Body Mass | 0.107           | 0.129     | 0.823          | 0.412          |
| Trophic Level_Predator:Log Body Mass | -0.087          | 0.115     | -0.766         | 0.430          |
| $\alpha$                             | 0.500           | <0.001    |                |                |
| <i>Reptiles</i>                      |                 |           |                |                |
| (Intercept)                          | -2.968          | 1.342     | -2.213         | 0.027          |
| Trophic Level_Omnivore               | 1.488           | 1.415     | 1.054          | 0.294          |
| Trophic Level_Predator               | 1.715           | 1.348     | 1.274          | 0.204          |
| Log Body Mass                        | 1.521           | 0.567     | 2.681          | 0.007          |
| Trophic Level_Omnivore:Log Body Mass | -1.206          | 0.644     | -1.874         | 0.063          |
| Trophic Level_Predator:Log Body Mass | -1.842          | 0.578     | -3.192         | 0.002          |
| $\alpha$                             | 0.091           | <0.001    |                |                |

Table S6: Summary statistics for phylogenetic generalized linear models examining the independent and interactive effects of trophic group (herbivore, omnivore, or predator) and body mass on the proportion of threatened mammals impacted by different anthropogenic drivers, and the summed number of drivers of extinction for each species. All coefficients are the averages of models fit across 1000 phylogenies; the exception is  $\alpha$  or  $\lambda$  (which measures the strength of phylogenetic signal; (36)), whose ‘Estimate’ is the mean across the phylogenies and the ‘SE’ the standard error of that mean. The logistic models’ (of individual threats) terms are tested using z-tests, while the summed threat model terms use t-tests.

|                                      | Estimate | SE     | z/t-statistic | p-value |
|--------------------------------------|----------|--------|---------------|---------|
| <b>Resource Use</b>                  |          |        |               |         |
| (Intercept)                          | -2.268   | 0.894  | -2.536        | 0.012   |
| Trophic Level Omnivore               | 0.142    | 0.659  | 0.215         | 0.828   |
| Trophic Level Predator               | -0.454   | 0.705  | -0.646        | 0.520   |
| Log Body Mass                        | 0.507    | 0.242  | 2.100         | 0.037   |
| $\alpha$                             | 0.023    | <0.001 |               |         |
| <b>Climate Change</b>                |          |        |               |         |
| (Intercept)                          | -3.062   | 0.293  | -10.466       | 0.000   |
| Trophic Level Omnivore               | -0.468   | 0.304  | -1.539        | 0.166   |
| Trophic Level Predator               | 0.446    | 0.238  | 1.851         | 0.132   |
| Log Body Mass                        | 0.408    | 0.070  | 5.805         | 0.002   |
| $\alpha$                             | 0.208    | <0.001 |               |         |
| <b>Habitat alteration</b>            |          |        |               |         |
| (Intercept)                          | -0.083   | 0.419  | -0.175        | 0.771   |
| Trophic Level Omnivore               | 1.743    | 0.741  | 2.357         | 0.024   |
| Trophic Level Predator               | 2.663    | 0.562  | 4.747         | <0.001  |
| Log Body Mass                        | 0.571    | 0.145  | 3.923         | 0.002   |
| Trophic Level Omnivore:Log Body Mass | -0.375   | 0.288  | -1.348        | 0.226   |
| Trophic Level Predator:Log Body Mass | -0.695   | 0.196  | -3.556        | 0.001   |
| $\alpha$                             | 0.152    | <0.001 |               |         |
| <b>Invasive species</b>              |          |        |               |         |
| (Intercept)                          | -2.254   | 0.508  | -4.437        | <0.001  |
| Trophic Level Omnivore               | 1.987    | 0.552  | 3.611         | 0.001   |
| Trophic Level Predator               | 0.394    | 0.569  | 0.692         | 0.497   |
| Log Body Mass                        | 0.393    | 0.123  | 3.208         | 0.008   |
| Trophic Level Omnivore:Log Body Mass | -0.563   | 0.189  | -2.985        | 0.005   |
| Trophic Level Predator:Log Body Mass | 0.025    | 0.165  | 0.150         | 0.853   |
| $\alpha$                             | 0.030    | <0.001 |               |         |
| <b>Pollution</b>                     |          |        |               |         |
| (Intercept)                          | -4.399   | 0.564  | -8.067        | <0.001  |
| Trophic Level Omnivore               | 1.135    | 0.455  | 2.563         | 0.026   |
| Trophic Level Predator               | 2.093    | 0.454  | 4.715         | 0.002   |
| Log Body Mass                        | 0.317    | 0.104  | 3.224         | 0.032   |
| $\alpha$                             | 0.056    | <0.001 |               |         |
| <b>Summed</b>                        |          |        |               |         |
| (Intercept)                          | -0.013   | 0.066  | -0.200        | 0.841   |
| Trophic Level Omnivore               | 0.096    | 0.018  | 5.366         | <0.001  |
| Trophic Level Predator               | -0.031   | 0.022  | -1.407        | 0.161   |
| Log Body Mass                        | -0.017   | 0.024  | -0.718        | 0.475   |
| $\lambda$                            | 0.596    | <0.001 |               |         |

Table S7: Summary statistics for phylogenetic generalized linear models examining the independent and interactive effects of trophic group (herbivore, omnivore, or predator) and body mass on the proportion of threatened birds impacted by independent and the sum of anthropogenic drivers of extinction. All coefficients are the averages of models fit across 1000 phylogenies; the exception is  $\alpha$  or  $\lambda$  (which measure the strength of phylogenetic signal; (36)), whose ‘Estimate’ is the mean across the phylogenies and the ‘SE’ the standard error of that mean. The logistic models’ (of individual threats) terms are tested using z-tests, while the summed threat model terms use t-tests.

|                                      | Estimate | SE     | z/t-statistic | p-value |
|--------------------------------------|----------|--------|---------------|---------|
| <b>Resource Use</b>                  |          |        |               |         |
| (Intercept)                          | -0.630   | 0.283  | -2.232        | 0.038   |
| Trophic Level Omnivore               | -0.469   | 0.233  | -2.013        | 0.075   |
| Trophic Level Predator               | -0.288   | 0.227  | -1.262        | 0.252   |
| Log Body Mass                        | 1.120    | 0.121  | 9.249         | <0.001  |
| $\alpha$                             | 0.182    | 0.002  |               |         |
| <b>Climate Change</b>                |          |        |               |         |
| (Intercept)                          | -1.207   | 0.281  | -4.306        | 0.011   |
| Trophic Level Omnivore               | 0.208    | 0.207  | 1.010         | 0.375   |
| Trophic Level Predator               | 0.050    | 0.206  | 0.288         | 0.276   |
| Log Body Mass                        | 0.239    | 0.101  | 2.312         | 0.142   |
| $\alpha$                             | 0.112    | 0.001  |               |         |
| <b>Habitat alteration</b>            |          |        |               |         |
| (Intercept)                          | 3.976    | 1.174  | 3.395         | 0.001   |
| Trophic Level Omnivore               | -2.969   | 1.249  | -2.389        | 0.021   |
| Trophic Level Predator               | -1.428   | 1.283  | -1.114        | 0.270   |
| Log Body Mass                        | -0.537   | 0.467  | -1.167        | 0.265   |
| Trophic Level Omnivore:Log Body Mass | 1.038    | 0.526  | 1.985         | 0.079   |
| Trophic Level Predator:Log Body Mass | 0.400    | 0.522  | 0.778         | 0.451   |
| $\alpha$                             | 0.063    | <0.001 |               |         |
| <b>Invasive species</b>              |          |        |               |         |
| (Intercept)                          | -0.666   | 0.622  | -1.072        | 0.287   |
| Trophic Level Omnivore               | 1.026    | 0.655  | 1.566         | 0.120   |
| Trophic Level Predator               | -0.887   | 0.679  | -1.307        | 0.194   |
| Log Body Mass                        | -0.087   | 0.260  | -0.331        | 0.732   |
| Trophic Level Omnivore:Log Body Mass | -0.271   | 0.291  | -0.934        | 0.358   |
| Trophic Level Predator:Log Body Mass | 0.640    | 0.294  | 2.175         | 0.032   |
| $\alpha$                             | 0.041    | <0.001 |               |         |
| <b>Pollution</b>                     |          |        |               |         |
| (Intercept)                          | -1.808   | 0.781  | -2.317        | 0.023   |
| Trophic Level Omnivore               | -0.466   | 0.898  | -0.519        | 0.605   |
| Trophic Level Predator               | -2.350   | 0.892  | -2.637        | 0.009   |
| Log Body Mass                        | -0.168   | 0.346  | -0.484        | 0.632   |
| Trophic Level Omnivore:Log Body Mass | 0.421    | 0.402  | 1.047         | 0.303   |
| Trophic Level Predator:Log Body Mass | 1.431    | 0.383  | 3.741         | <0.001  |
| $\alpha$                             | 0.069    | <0.001 |               |         |
| <b>Summed</b>                        |          |        |               |         |
| (Intercept)                          | -0.085   | 0.086  | -1.007        | 0.318   |
| Trophic Level Omnivore               | 0.058    | 0.042  | 1.394         | 0.164   |
| Trophic Level Predator               | 0.076    | 0.046  | 1.630         | 0.104   |
| Log Body Mass                        | 0.084    | 0.021  | 4.042         | <0.001  |
| Trophic Level Omnivore:Log Body Mass | -0.005   | 0.021  | -0.229        | 0.819   |
| Trophic Level Predator:Log Body Mass | 0.006    | 0.023  | 0.271         | 0.787   |
| $\lambda$                            | 0.264    | <0.001 |               |         |

Table S8: Summary statistics for phylogenetic generalized linear models examining the independent and interactive effects of trophic group (herbivore, omnivore, or predator) and body mass on the proportion of threatened reptiles impacted by different anthropogenic drivers. All coefficients are the averages of models fit across 1000 phylogenies; the exception is  $\alpha$  or  $\lambda$  (which measures the strength of phylogenetic signal; (36)), whose ‘Estimate’ is the mean across the phylogenies and the ‘SE’ the standard error of that mean. The logistic models’ (of individual threats) terms are tested using z-tests, while the summed threat model terms use t-tests.

|                                      | Estimate | SE     | z/t-statistic | p-value |
|--------------------------------------|----------|--------|---------------|---------|
| <b>Resource Use</b>                  |          |        |               |         |
| (Intercept)                          | -0.246   | 0.712  | -0.355        | 0.708   |
| Trophic Level Omnivore               | 0.641    | 0.584  | 1.087         | 0.293   |
| Trophic Level Predator               | 0.671    | 0.604  | 1.098         | 0.298   |
| Log Body Mass                        | -0.152   | 0.186  | -0.775        | 0.189   |
| $\alpha$                             | 0.028    | <0.001 |               |         |
| <b>Climate Change</b>                |          |        |               |         |
| (Intercept)                          | -2.268   | 0.894  | -2.536        | 0.012   |
| Trophic Level Omnivore               | 0.142    | 0.659  | 0.215         | 0.828   |
| Trophic Level Predator               | -0.454   | 0.705  | -0.646        | 0.520   |
| Log Body Mass                        | 0.507    | 0.242  | 2.100         | 0.037   |
| $\alpha$                             | 0.023    | <0.001 |               |         |
| <b>Habitat alteration</b>            |          |        |               |         |
| (Intercept)                          | 2.150    | 0.815  | 2.638         | 0.009   |
| Trophic Level Omnivore               | -0.056   | 0.644  | -0.083        | 0.893   |
| Trophic Level Predator               | 0.262    | 0.660  | 0.400         | 0.692   |
| Log Body Mass                        | -0.562   | 0.216  | -2.605        | 0.009   |
| $\alpha$                             | 0.034    | <0.001 |               |         |
| <b>Invasive species</b>              |          |        |               |         |
| (Intercept)                          | 0.890    | 0.773  | 1.147         | 0.259   |
| Trophic Level Omnivore               | -1.779   | 0.655  | -2.717        | 0.008   |
| Trophic Level Predator               | -1.902   | 0.652  | -2.918        | 0.005   |
| Log Body Mass                        | -0.002   | 0.209  | -0.007        | 0.872   |
| $\alpha$                             | 0.027    | <0.001 |               |         |
| <b>Pollution</b>                     |          |        |               |         |
| (Intercept)                          | -2.954   | 1.140  | -2.591        | 0.010   |
| Trophic Level Omnivore               | 0.914    | 0.969  | 0.944         | 0.350   |
| Trophic Level Predator               | 0.197    | 0.995  | 0.195         | 0.844   |
| Log Body Mass                        | 0.252    | 0.263  | 0.958         | 0.344   |
| $\alpha$                             | 0.109    | 0.001  |               |         |
| <b>Summed</b>                        |          |        |               |         |
| (Intercept)                          | -0.062   | 0.246  | -0.251        | 0.802   |
| Trophic Level Omnivore               | 0.090    | 0.210  | 0.426         | 0.670   |
| Trophic Level Predator               | 0.204    | 0.201  | 1.017         | 0.310   |
| Log Body Mass                        | 0.239    | 0.078  | 3.061         | 0.002   |
| Trophic Level Omnivore:Log Body Mass | -0.090   | 0.088  | -1.026        | 0.305   |
| Trophic Level Predator:Log Body Mass | -0.267   | 0.080  | -3.364        | <0.001  |
| $\lambda$                            | 0.355    | <0.001 |               |         |

Table S9 Percentage of species in the data set where trophic level was identified using the different types and quality of diet data.

| <b>Data Quality</b>                                                                   | <b>Herbivore</b> | <b>Omnivore</b> | <b>Predator</b> |
|---------------------------------------------------------------------------------------|------------------|-----------------|-----------------|
| Quantitatively assessed diet                                                          | 88%              | 82%             | 50%             |
| Ranked or weighted presence-absence data                                              | 5%               | 1%              | 18%             |
| Unranked presence-absence data                                                        | 1%               | 6%              | 6%              |
| Extrapolated from a former species classification quantitatively assessed             | 1%               | 1%              | 1%              |
| Extrapolated from a former species classification ranked or weighted presence-absence | 2%               | 0%              | 3%              |
| Extrapolated from a former species classification unranked presence-absence data      | 2%               | 5%              | 1%              |
| Extrapolated from a congener                                                          | 1%               | 4%              | 18%             |
| Extrapolated from a confamiliar                                                       | <1%              | <1%             | 2%              |
